# Supplementary material for: Characterization of streak development for boundary layer transition caused by isolated and distributed roughness
Source: Research Square preprint supplement (doi:10.21203/rs.3.rs-1940022/v1), 2022-08-11
Supplement: Supplementary file 1 [file 110bc4c97a653de04debc3a4.pdf]

# Supplementary Material: Characterization of streak development for boundary layer transition caused by isolated and distributed roughness

Robin Joseph<sup>1</sup>, P. Phani Kumar<sup>1,2</sup> and Sourabh S. Diwan<sup>1†</sup>

<sup>1</sup>Department of Aerospace engineering, Indian Institute of Science, Bengaluru, 560012

<sup>2</sup>Present address: LPSC, Indian Space Research Organization, Thiruvananthapuram, 695547

## 1. Supplementary Material

Here, we present some additional figures to supplement the main text. Figure S1 shows the fluctuating velocity signals acquired using the hotwire probe at  $y = 1$  mm from the wall. Figure S2 shows two instances of instability developing on the steady streaks caused by the distributed roughness in spanwise PIV measurements at  $x_c = 242$  mm. The supplementary video S1 shows a movie of the onset of streak instability developing near steady streaks for configuration A (distributed roughness) at  $x_c = 242$  mm (colour contours and vectors are same as that of figure S2). Figures S3 and S4 respectively show other instances of lifted-up backward streak (“outer” mode) and streak interaction (“inner” mode) at  $x_c = 440$  mm for configuration A (distributed roughness). Figures S5 and S6 show similar such instances for configuration B (isolated roughness) at  $x_c = 738$  mm.

† Email address for correspondence: sdiwan@iisc.ac.in

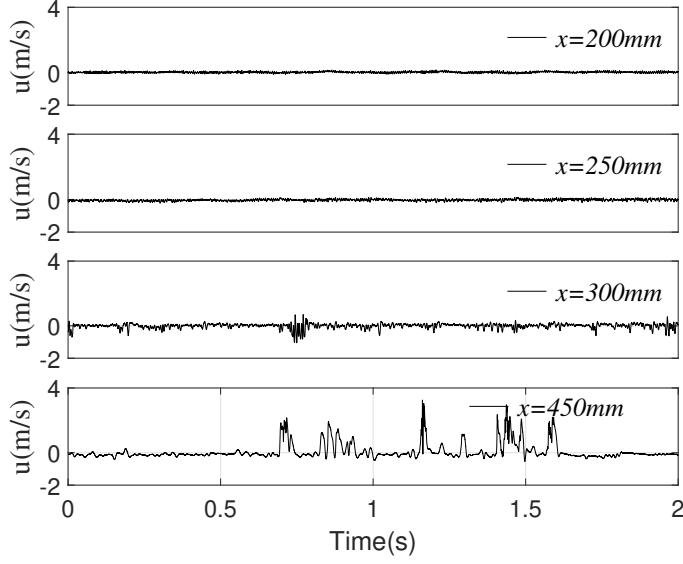

Figure S1: Fluctuating velocity signals at different streamwise locations for configuration A, acquired using hotwire anemometry.

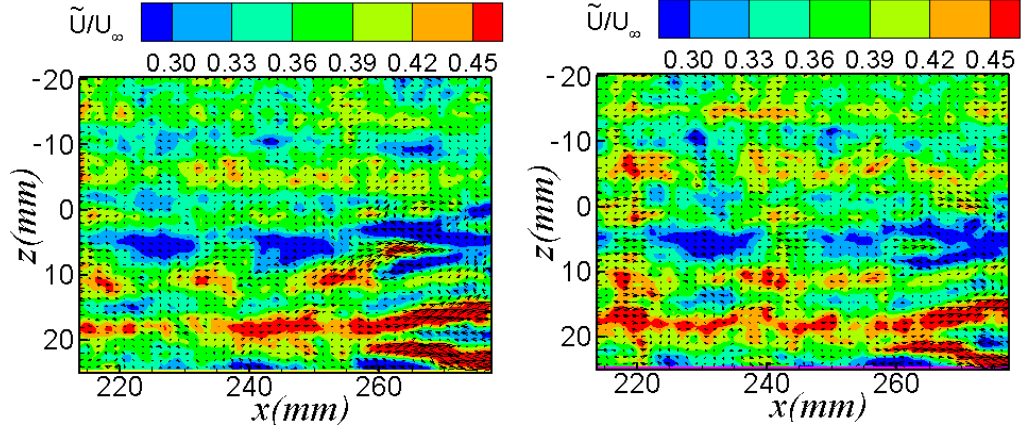

Figure S2: Instantaneous PIV frames in the  $x$ - $z$  plane showing streak instability developing at  $x_c = 242$  mm and  $y/\delta^* \approx 0.64$  ( $y/\delta \approx 0.24$ ) for configuration A. The color contours represent instantaneous streamwise velocity and the vectors represent fluctuating velocity  $(u, v)$ .

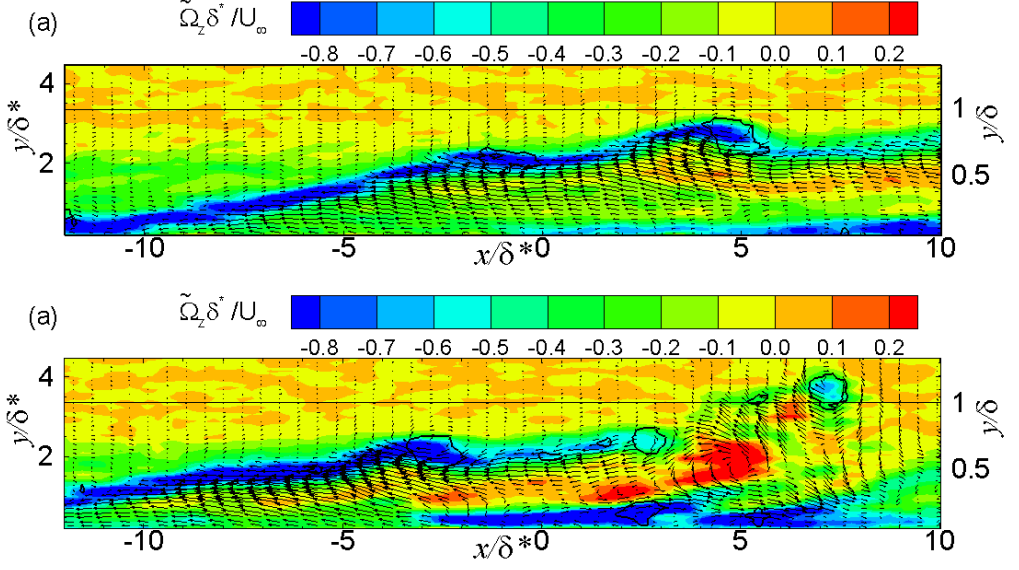

Figure S3: Instantaneous PIV frames in the  $x$ - $y$  plane showing lifted-up backward streaks undergoing instability in configuration A at  $x_c=440$  mm. The color contours represent normalized instantaneous spanwise vorticity and the vectors represent fluctuating velocity  $(u, v)$ . The line contours indicate locations of the vortices obtained using the  $\lambda$  criterion (see the main text).

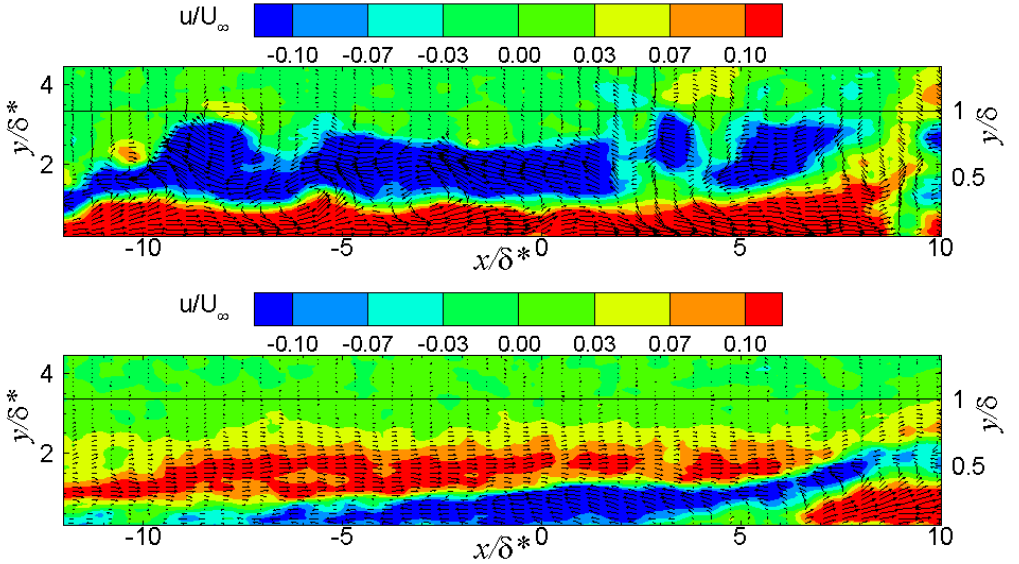

Figure S4: Instantaneous PIV frames in the  $x$ - $y$  plane showing streak interaction in configuration A at  $x_c = 440$  mm. The color contours show streamwise ( $u$ ) fluctuating velocity and the vectors represent fluctuating velocity  $(u, v)$ .

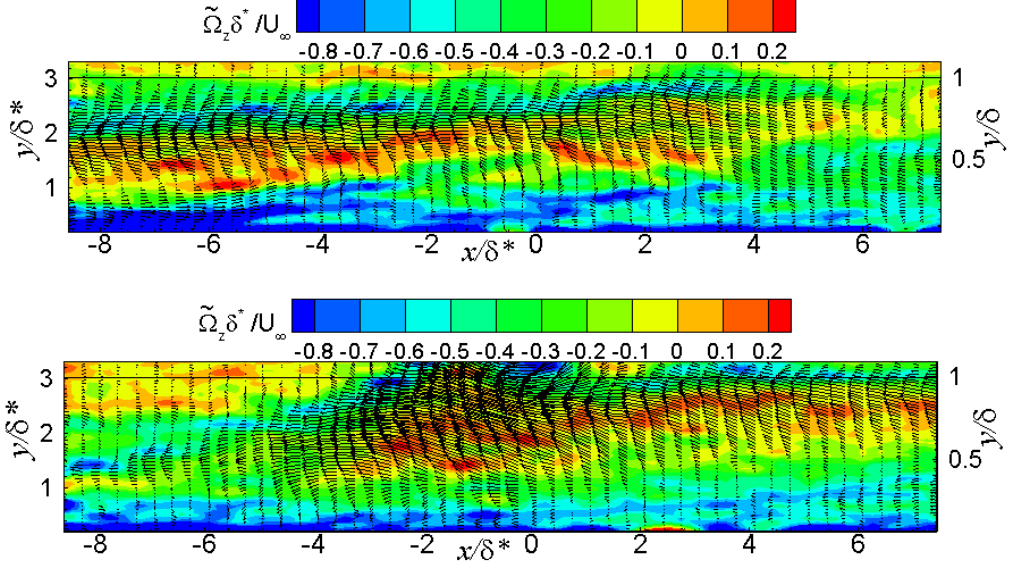

Figure S5: Instantaneous PIV frames in the  $x$ - $y$  plane showing lifted-up backward streak in configuration B at  $x_c = 738$  mm. The color contours represent normalized spanwise vorticity and the vectors represent fluctuating velocity  $(u, v)$ .

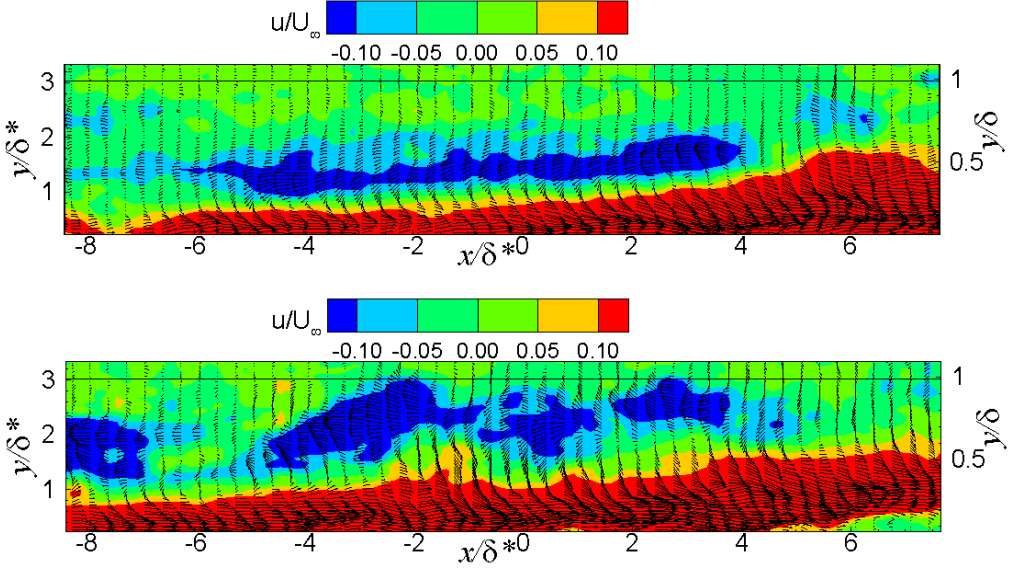

Figure S6: Instantaneous PIV frames in the  $x$ - $y$  plane showing streak interaction in configuration B at  $x_c = 738$  mm. The color contours show streamwise ( $u$ ) fluctuating velocity and the vectors represent fluctuating velocity  $(u, v)$ .
